# Supplementary material for: Zoledronic acid-encapsulating self-assembling nanoparticles and doxorubicin: a combinatorial approach to overcome simultaneously chemoresistance and immunoresistance in breast tumors
Source: PubMed Central journal article supplement (PMC4991490; doi:10.18632/oncotarget.8012), 2016-03-09
Supplement: oncotarget-07-20753-s001.pdf [file oncotarget-07-20753-s001.pdf]

## Zoledronic acid-encapsulating self-assembling nanoparticles and doxorubicin: a combinatorial approach to overcome simultaneously chemoresistance and immunoresistance in breast tumors

### Supplementary Materials

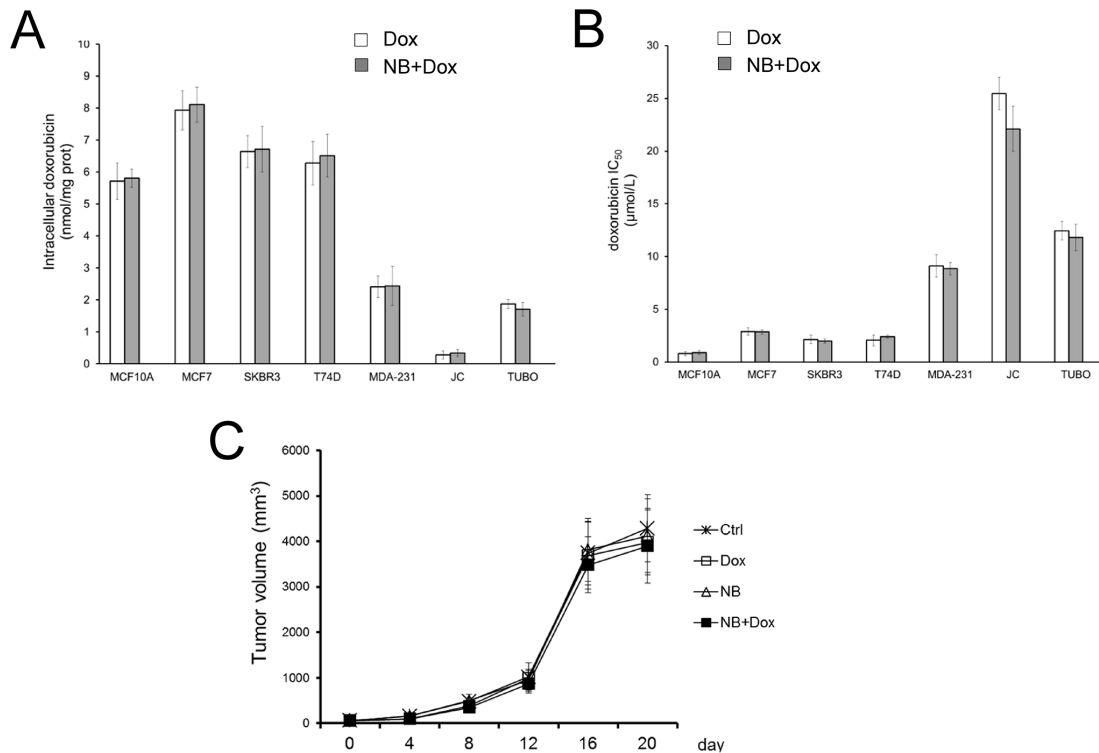

**Supplementary Figure S1: Nanoparticles without zoledronic acid do not reverse doxorubicin resistance.** Human non transformed breast epithelial MCF10A cells, human breast cancer MCF7, SKBR3, T74D, MDA-MB-231 cells, murine mammary cancer TUBO and JC cells were subjected to the following investigations. (A) Cells were incubated for 24 h with 5 µmol/L doxorubicin (Dox) or with 1 µmol/L nanoparticles without zoledronic acid (blank nanoparticles, NB) for 24 h, followed by 5 µmol/L doxorubicin for additional 24 h (NB + Dox). The intracellular content of doxorubicin was measured spectrofluorimetrically in duplicate ( $n = 4$ ). Data are presented as means  $\pm$  SD. There were not statistically significant differences between Dox and NB + Dox in each cell line. (B) Cells were left untreated or incubated for 72 h in the presence of 1 µmol/L NB; different concentrations (1 nmol/L, 10 nmol/L, 100 nmol/L, 1 µmol/L, 10 µmol/L, 100 µmol/L, 1 mmol/L) of doxorubicin (Dox) were added in the last 48 h. Samples were then stained in quadruplicate with the neutral red solution ( $n = 4$ ).  $IC_{50}$  was calculated as the concentration of doxorubicin that kills 50% of cells. Data are presented as means  $\pm$  SD. There were not statistically significant differences between Dox and NB + Dox in each cell line. (C) Six weeks-old female BALB/c mice bearing 60 mm<sup>3</sup> JC tumors were randomly divided into the following groups (10 mice/group): 1) Ctrl group, treated with 0.1 mL saline solution i.v. at day 3, 9, 15; 2) Dox group, treated with 5 mg/kg doxorubicin i.v. at day 3, 9, 15; 3) NB group, treated with 20 µg/mouse nanoparticle formulation without zoledronic acid i.v. at day 2, 8, 14; 4) NB + Dox group, treated with 20 µg/mouse NB i.v. at day 2, 8, 14 followed by 5 mg/kg doxorubicin i.v. at day 3, 9, 15. Tumor growth was monitored daily by caliper measurement. Data are presented as means  $\pm$  SD. There were not statistically significant differences among each group of treatment.

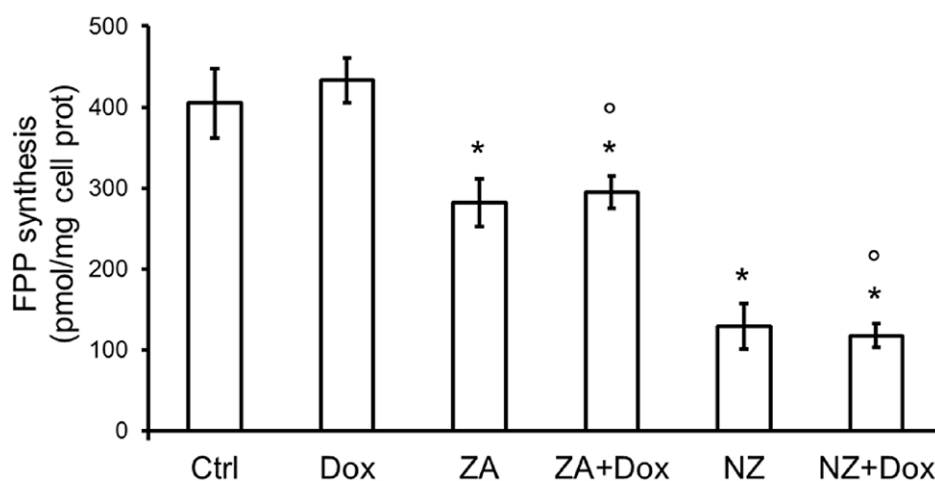

**Supplementary Figure S2: NZ lowers the synthesis of FPP in chemoresistant cells.** JC cells were grown in fresh medium (Ctrl) or medium containing 5  $\mu\text{mol/L}$  doxorubicin (Dox, 24 h), 1  $\mu\text{mol/L}$  zoledronic acid (ZA, 48 h), 1  $\mu\text{mol/L}$  ZA for 24 h followed by 5  $\mu\text{mol/L}$  doxorubicin for additional 24 h (ZA + Dox), 1  $\mu\text{mol/L}$  self-assembling ZA formulation (NZ, 48 h), 1  $\mu\text{mol/L}$  NZ for 24 h followed by 5  $\mu\text{mol/L}$  doxorubicin for additional 24 h (NZ + Dox). Cells were radiolabeled during the last 24 h with [ $^3\text{H}$ ]-acetate, then the *de novo* synthesis of FPP was measured. Data are presented as means  $\pm$  SD ( $n = 3$ ). Versus Ctrl: \* $p < 0.05$ ; versus Dox: ° $p < 0.005$ .

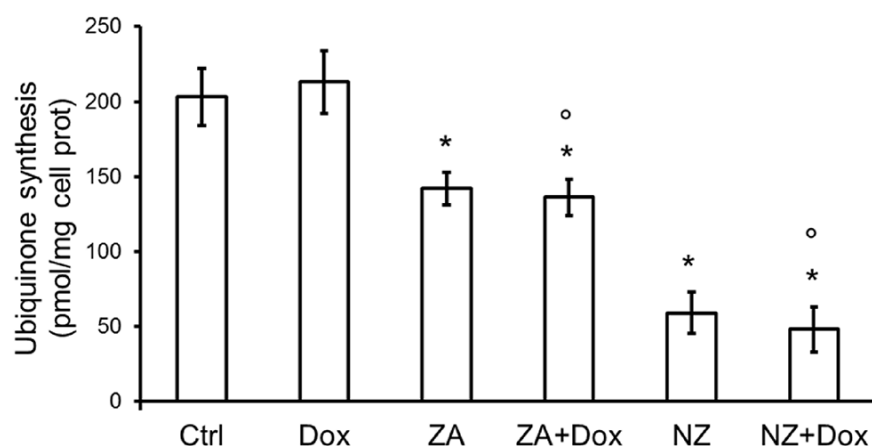

**Supplementary Figure S3: NZ lowers the synthesis of ubiquinone in chemoresistant cells.** JC cells were grown in fresh medium (Ctrl) or medium containing 5  $\mu\text{mol/L}$  doxorubicin (Dox, 24 h), 1  $\mu\text{mol/L}$  zoledronic acid (ZA, 48 h), 1  $\mu\text{mol/L}$  ZA for 24 h followed by 5  $\mu\text{mol/L}$  doxorubicin for additional 24 h (ZA + Dox), 1  $\mu\text{mol/L}$  self-assembling ZA formulation (NZ, 48 h), 1  $\mu\text{mol/L}$  NZ for 24 h followed by 5  $\mu\text{mol/L}$  doxorubicin for additional 24 h (NZ + Dox). Cells were radiolabeled during the last 24 h with [ $^3\text{H}$ ]-acetate, then the *de novo* synthesis of ubiquinone was measured. Data are presented as means  $\pm$  SD ( $n = 3$ ). Versus Ctrl: \* $p < 0.05$ ; versus Dox: ° $p < 0.001$ .

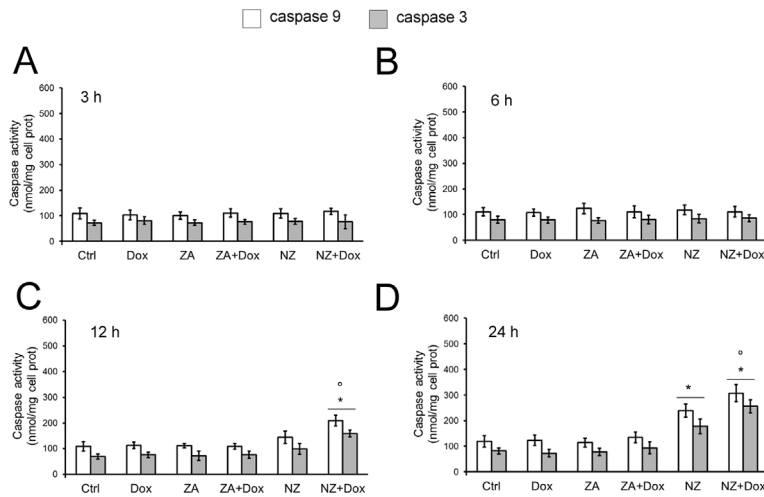

**Supplementary Figure S4: Time-dependent activation of caspase 9 and caspase 3 in chemoresistant cells.** (A–D) JC cells were grown in fresh medium (Ctrl) or medium containing 5  $\mu\text{mol/L}$  doxorubicin (Dox, 24 h), 1  $\mu\text{mol/L}$  zoledronic acid (ZA, for 3, 6, 12, 24 h as indicated in each panel), 1  $\mu\text{mol/L}$  ZA for the indicated periods followed by 5  $\mu\text{mol/L}$  doxorubicin for additional 24 h (ZA + Dox), 1  $\mu\text{mol/L}$  self-assembling ZA formulation (NZ, for 3, 6, 12, 24 h as indicated in each panel), 1  $\mu\text{mol/L}$  NZ for the indicated periods followed by 5  $\mu\text{mol/L}$  doxorubicin for additional 24 h (NZ + Dox). The activities of caspase 9 and 3 were measured spectrofluorimetrically in the cell lysates. Data are presented as means  $\pm$  SD ( $n = 3$ ). Versus Ctrl: \* $p < 0.01$ ; versus Dox:  $^{\circ}p < 0.005$ .

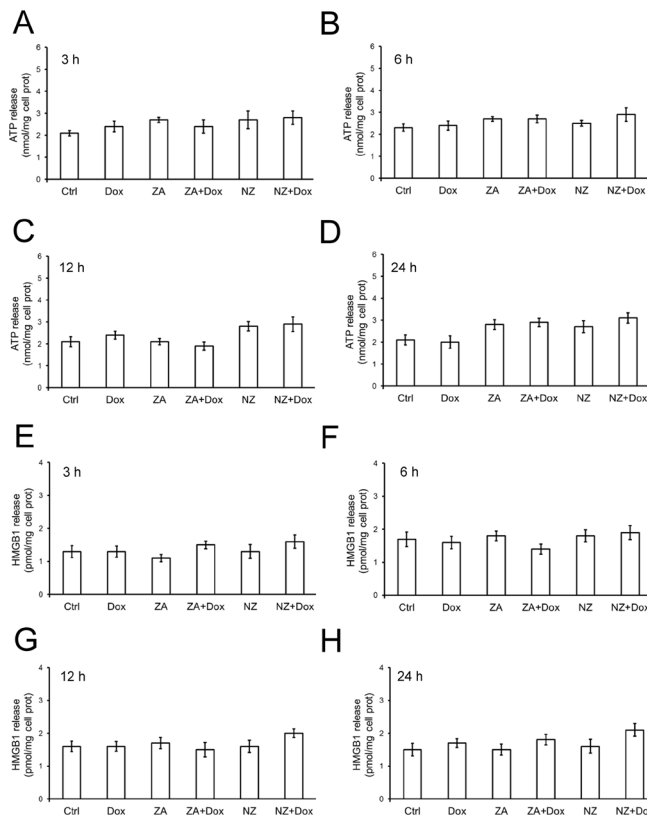

**Supplementary Figure S5: Time-dependent release of ATP and HMGB1 in chemoresistant cells.** JC cells were grown in fresh medium (Ctrl) or medium containing 5  $\mu\text{mol/L}$  doxorubicin (Dox, 24 h), 1  $\mu\text{mol/L}$  zoledronic acid (ZA, for 3, 6, 12, 24 h as indicated in each panel), 1  $\mu\text{mol/L}$  ZA for the indicated periods followed by 5  $\mu\text{mol/L}$  doxorubicin for additional 24 h (ZA + Dox), 1  $\mu\text{mol/L}$  self-assembling ZA formulation (NZ, for 3, 6, 12, 24 h as indicated in each panel), 1  $\mu\text{mol/L}$  NZ for the indicated periods followed by 5  $\mu\text{mol/L}$  doxorubicin for additional 24 h (NZ + Dox). (A–D) The extracellular release of ATP was measured by a chemiluminescence-based assay. Data are presented as means  $\pm$  SD ( $n = 3$ ). There were not statistically significant differences among each group of treatment. (E–H) The extracellular release of HMGB1 was measured by ELISA. Data are presented as means  $\pm$  SD ( $n = 3$ ). There were not statistically significant differences among each group of treatment.

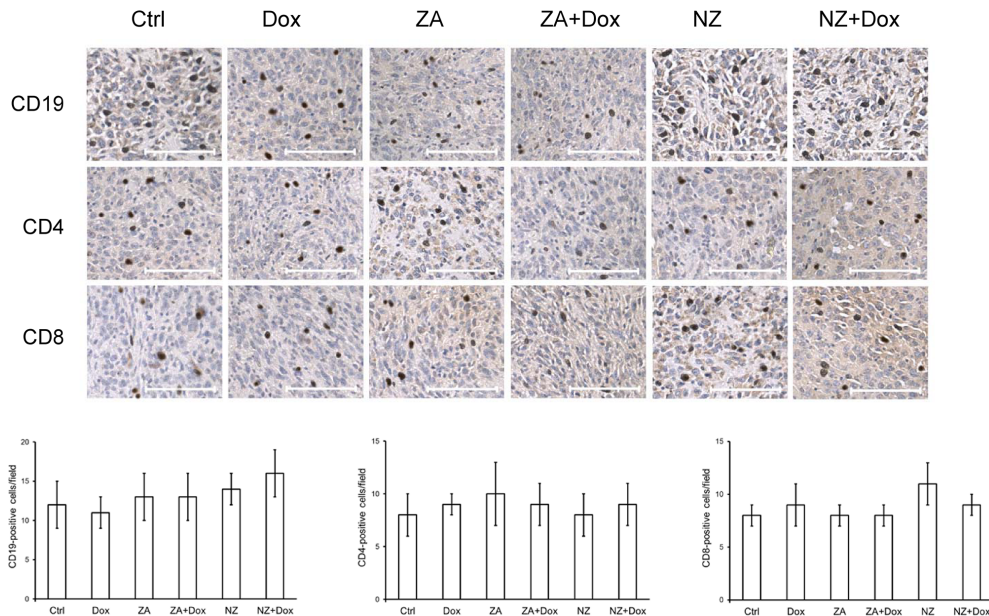

**Supplementary Figure S6: Histochemical analysis of immune cells infiltrating mammary chemoresistant JC tumors.**

Six weeks-old female BALB/c mice bearing 60 mm<sup>3</sup> JC-luc tumors were randomly divided into the following groups (10 mice/group): 1) Ctrl group, treated with 0.1 mL saline solution i.v. at day 3, 9, 15; 2) Dox group, treated with 5 mg/kg doxorubicin i.v. at day 3, 9, 15; 3) ZA group, treated with 20 µg/mouse ZA i.v. at day 2, 8, 14; 4) ZA + Dox group, treated with 20 µg/mouse ZA i.v. at day 2, 8, 14 followed by 5 mg/kg doxorubicin i.v. at day 3, 9, 15; 5) NZ group, treated with 20 µg/mouse self-assembling ZA formulation i.v. at day 2, 8, 14; 6) NZ + Dox group, treated with 20 µg/mouse NZ i.v. at day 2, 8, 14 followed by 5 mg/kg doxorubicin i.v. at day 3, 9, 15. Sections of tumors from each group of animals were immunostained for CD19, a marker of B-lymphocytes; CD4, a marker of T-helper lymphocytes; CD8, a marker of T-cytotoxic lymphocytes. Nuclei were counter-stained with hematoxylin. Bar = 10 µm (63× objective). The photographs are representative of sections from 10 tumors/group. The number of positive cells/field was calculated by analyzing sections from 10 animals of each group (111–75 cells/field), using ImageJ software (<http://imagej.nih.gov/ij/>). Data are presented as means ± SD. There were not statistically significant differences among each group of treatment.

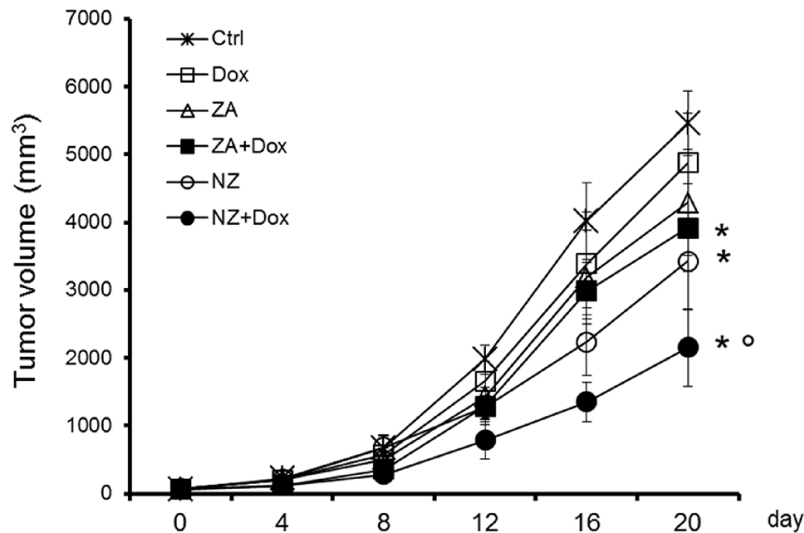

**Supplementary Figure S7: Anti-tumor effects of NZ in immunodeficient mice.** Six weeks-old female NOD SCID BALB/c mice bearing 60 mm<sup>3</sup> JC tumors were randomly divided into the following groups (10 mice/group): 1) Ctrl group, treated with 0.1 mL saline solution i.v. at day 3, 9, 15; 2) Dox group, treated with 5 mg/kg doxorubicin i.v. at day 3, 9, 15; 3) ZA group, treated with 20 µg/mouse ZA i.v. at day 2, 8, 14; 4) ZA + Dox group, treated with 20 µg/mouse ZA i.v. at day 2, 8, 14 followed by 5 mg/kg doxorubicin i.v. at day 3, 9, 15; 5) NZ group, treated with 20 µg/mouse self-assembling ZA formulation i.v. at day 2, 8, 14; 6) NZ + Dox group, treated with 20 µg/mouse NZ i.v. at day 2, 8, 14 followed by 5 mg/kg doxorubicin i.v. at day 3, 9, 15. Tumor growth was monitored daily by caliper measurement. Data are presented as means ± SD. Versus Ctrl group: \**p* < 0.01; NZ + Dox group in NOD SCID mice versus NZ + Dox group in immunocompetent mice (Figure 2C): °*p* < 0.02.

**Supplementary Table S1: Primers sequence for qRT-PCR**

| <b>Gene</b>  | <b>Forward primer</b> | <b>Reverse primer</b>  |
|--------------|-----------------------|------------------------|
| <i>GLUT1</i> | CCTGCAGTTTGGCTACAACA  | TAACGAAAAGGCCACAGAG    |
| <i>HK</i>    | AGACGCACCCACAGTATTCC  | CGCATCCTCTTCTTCACCTC   |
| <i>PFK1</i>  | GGAGCTTCGAGAACAACCTGG | CTGTGTGTCCATGGGAGATG   |
| <i>GAPDH</i> | GAAGGTGAAGGTCGGAGT    | CATGGTGGAATCATATTGGAA  |
| <i>ENO-A</i> | GCTCCGGGACAATGATAAGA  | TCCATCCATCTCGATCATCA   |
| <i>PK</i>    | TGCAGTGGAGCTCAGAGAGA  | GCTCCGGTGACATAATGCT    |
| <i>Pgp</i>   | TGCTGGAGCGGTTCTACG    | ATAGGCAATGTTCTCAGCAATG |
| <i>IDO</i>   | CAGGCAGATGTTTAGCAATGA | GATGAAGAAGTGGGCTTTGC   |
| <i>S14</i>   | GGTGCAAGGAGCTGGGTAT   | TCCAGGGGTCTTGGTCCTATTT |
